# Supplementary material
Source: MDPI journal article supplement (https://www.mdpi.com/2673-6756/2/3/38)
Supplement: s1 [file s1]

---

## Supplementary Materials

# “Tooth Cementum Annulation: a Literature Review”

### Table of Contents:

**Figure S1:** Mapping of the main keywords for the studies regarding the dental cementum, when searched in Web of Science. Map produced in VOSviewer ©

**Figure S2:** Mapping of the authors for the studies regarding the human dental cementum, visualized by year (searched in Web of Science). Map produced in VOSviewer ©

**Table S1:** Microsoft Excel table for the human studies selected for this review (Table S1.xlsx)

**Table S2:** Microsoft Excel table for the animal studies selected for this review (Table S2.xlsx)

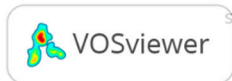

Science. Map produced in VOSviewer ©

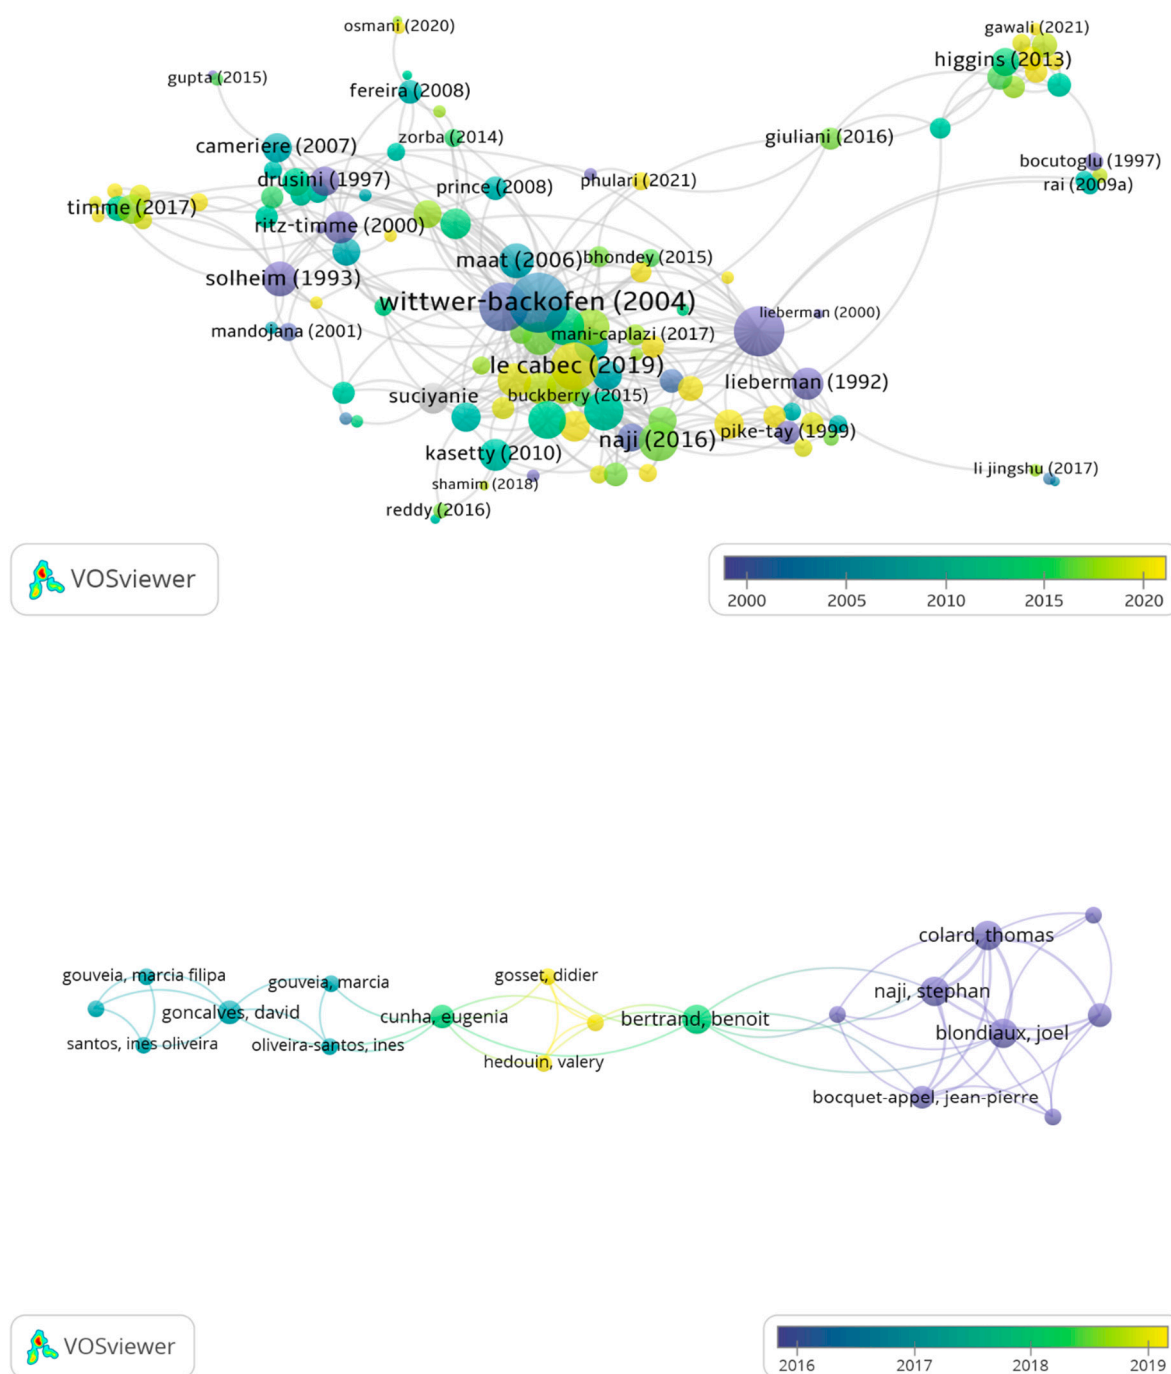

Figure S2 .Mapping of the authors for the studies regarding the human dental cementum, visualized by year (searched in Web of Science). Map produced in VOSviewer ©
